# Supplementary material
Source: PubMed Central journal article supplement (PMC4286190)
Supplement: NIHMS650234-supplement-Supp_Data_-_Fig_1.pdf [file NIHMS650234-supplement-Supp_Data_-_Fig_1.pdf]

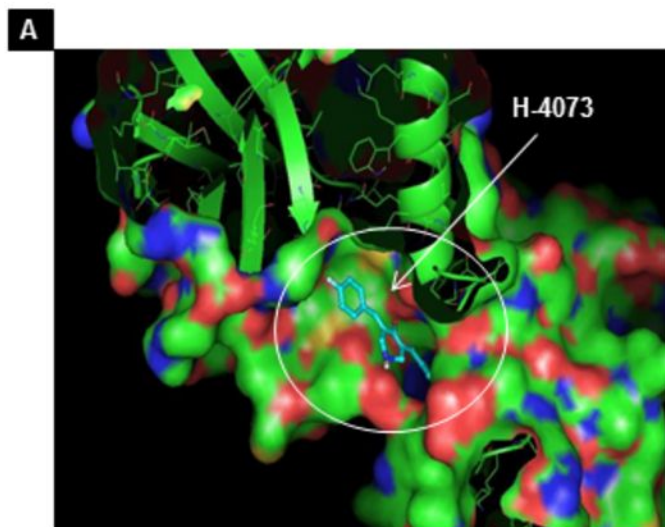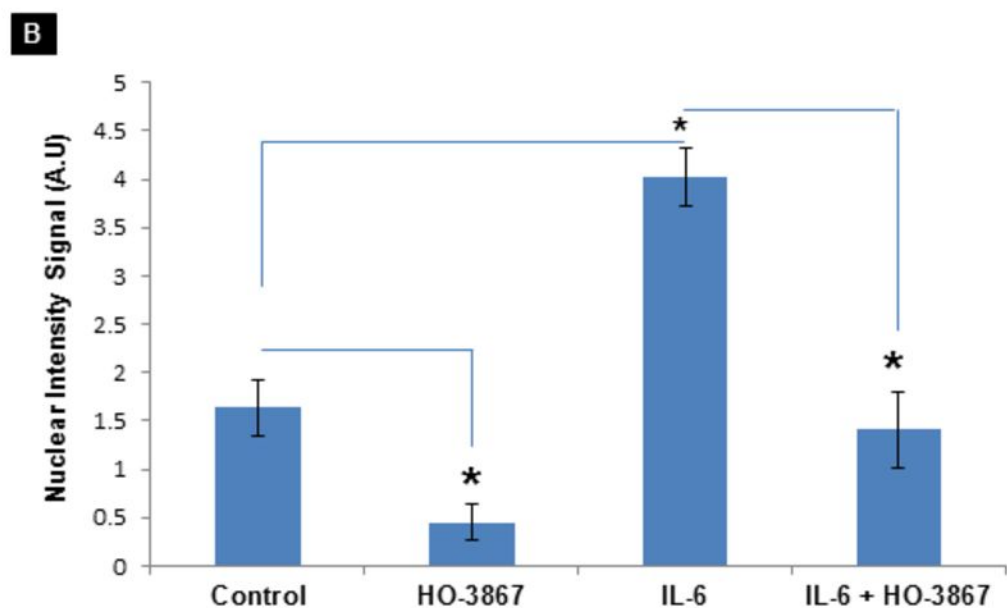

**A.** Image of H-4073 docked with the STAT3 monomer at the preferred site on the DNA binding domain as determined by AutoDock simulation.

**B:** STAT3 translocation assay using A2780 (cisplatin-sensitive) ovarian cancer cells. The intensity of pSTAT3 nuclear staining was quantified using the green channel by selecting 50 cells per slide for quantification. Treatment with HO-3867 10  $\mu$ M reduced overall pSTAT3 nuclear expression when compared to untreated control cells or cells exposed to IL-6 alone (50 ng/ml). Comparisons were made using ANOVA with  $p < 0.05$  being significant (\* $p \leq 0.01$ ).
