# Supplementary material
Source: PubMed Central journal article supplement (PMC4286190)
Supplement: NIHMS650234-supplement-Supp_Data_-_Fig_2.pdf [file NIHMS650234-supplement-Supp_Data_-_Fig_2.pdf]

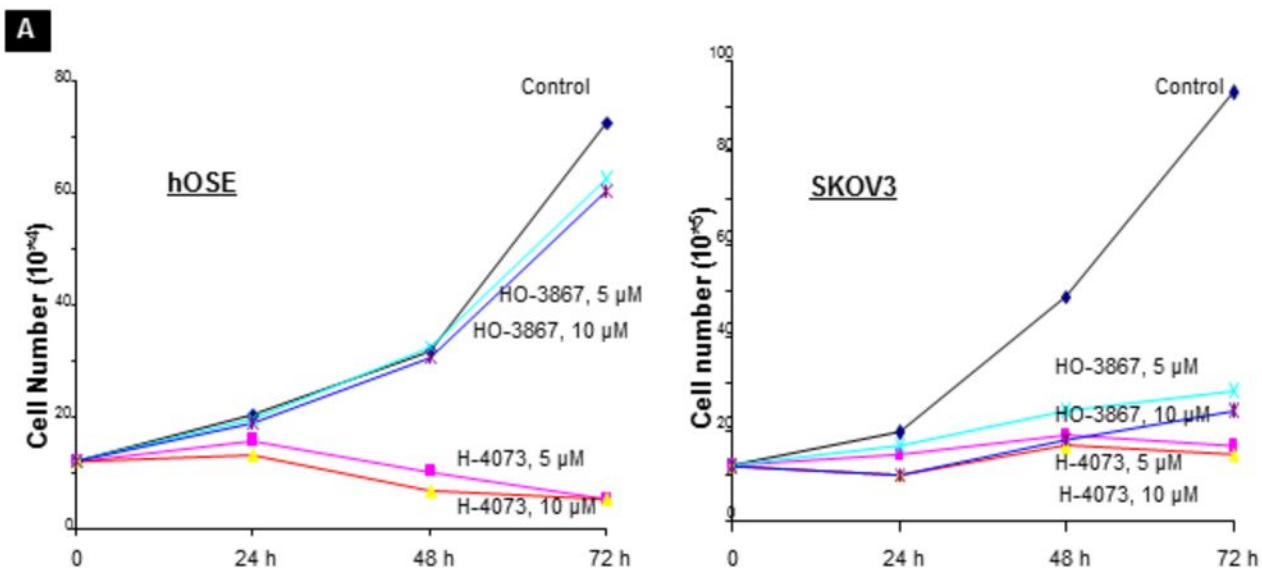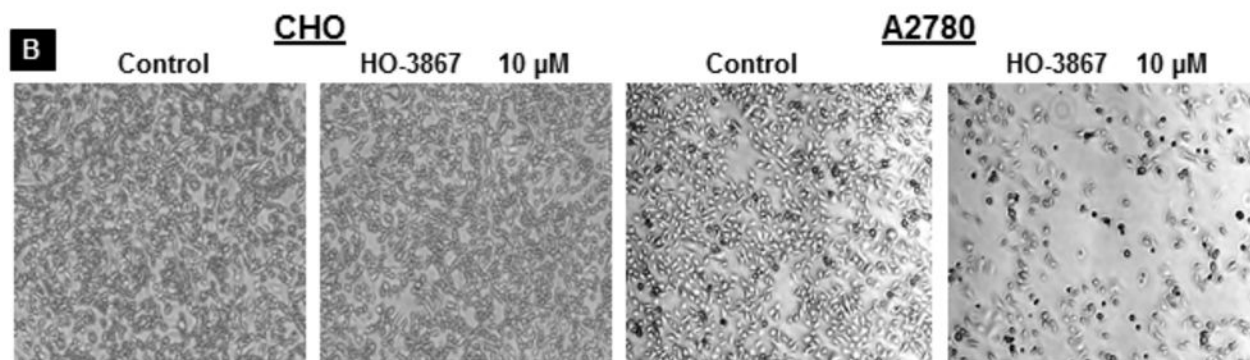

A. SKOV3 ovarian cancer and hOSE cells were treated with 5 or 10  $\mu$ M of H-4073 or HO-3867 for up to 72 hours, and the cellular growth rates were plotted. H-4073 was toxic to both cell types, while HO-3867 was toxic only to ovarian cancer cells. Untreated controls of each cell type are shown for comparison.

B. A2780 and CHO cells were treated with 10  $\mu$ M of H-4073 or HO-3867 for 24 hours. Untreated controls were used for comparison. Cells were collected and counted using a NucleoCounter cell counter. HO-3867 was toxic only to the ovarian cancer cell line.
