# Supplementary material
Source: PubMed Central journal article supplement (PMC4286190)
Supplement: NIHMS650234-supplement-Supp_Data_-_Fig_3.pdf [file NIHMS650234-supplement-Supp_Data_-_Fig_3.pdf]

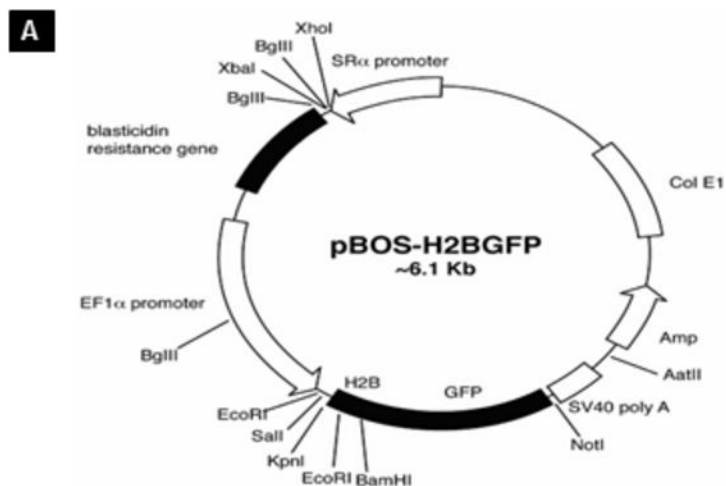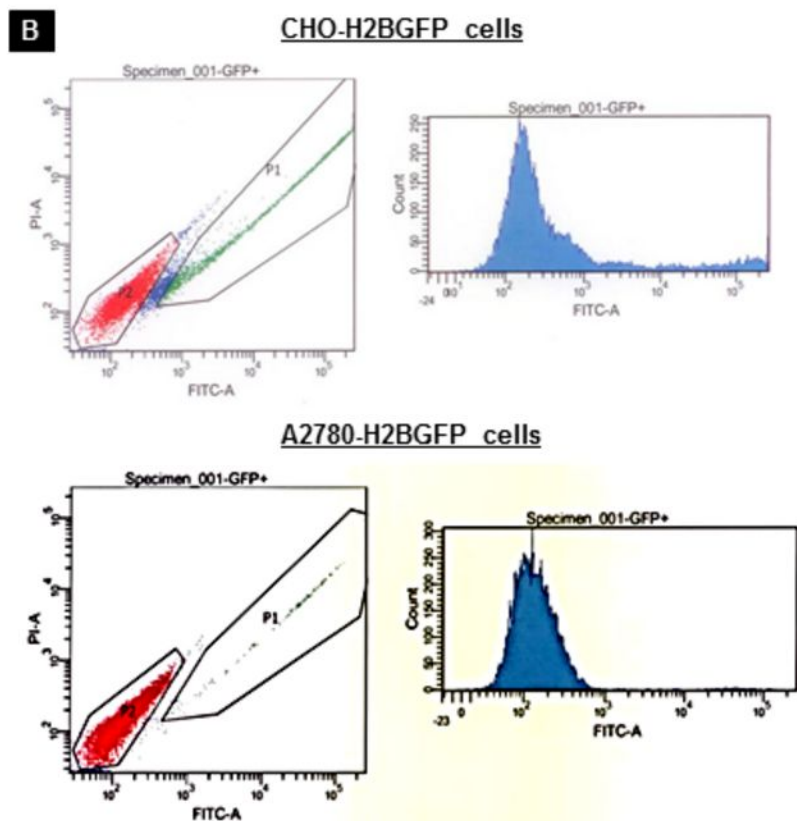

A. Illustration of the GFP-Histone 2B fusion protein (pBOS H2BGFP) vector used for transfection of ovarian cancer and CHO cells

B. Confirmation of successful transfection using the pBOS H2BGFP vector in A2780 and CHO cells as determined by flow cytometry. Engineered cell lines were used for chromosomal aberration studies following exposure to DAP compounds.
