# Supplementary material
Source: PubMed Central journal article supplement (PMC4286190)
Supplement: NIHMS650234-supplement-Supp_Data_-_Fig_4.pdf [file NIHMS650234-supplement-Supp_Data_-_Fig_4.pdf]

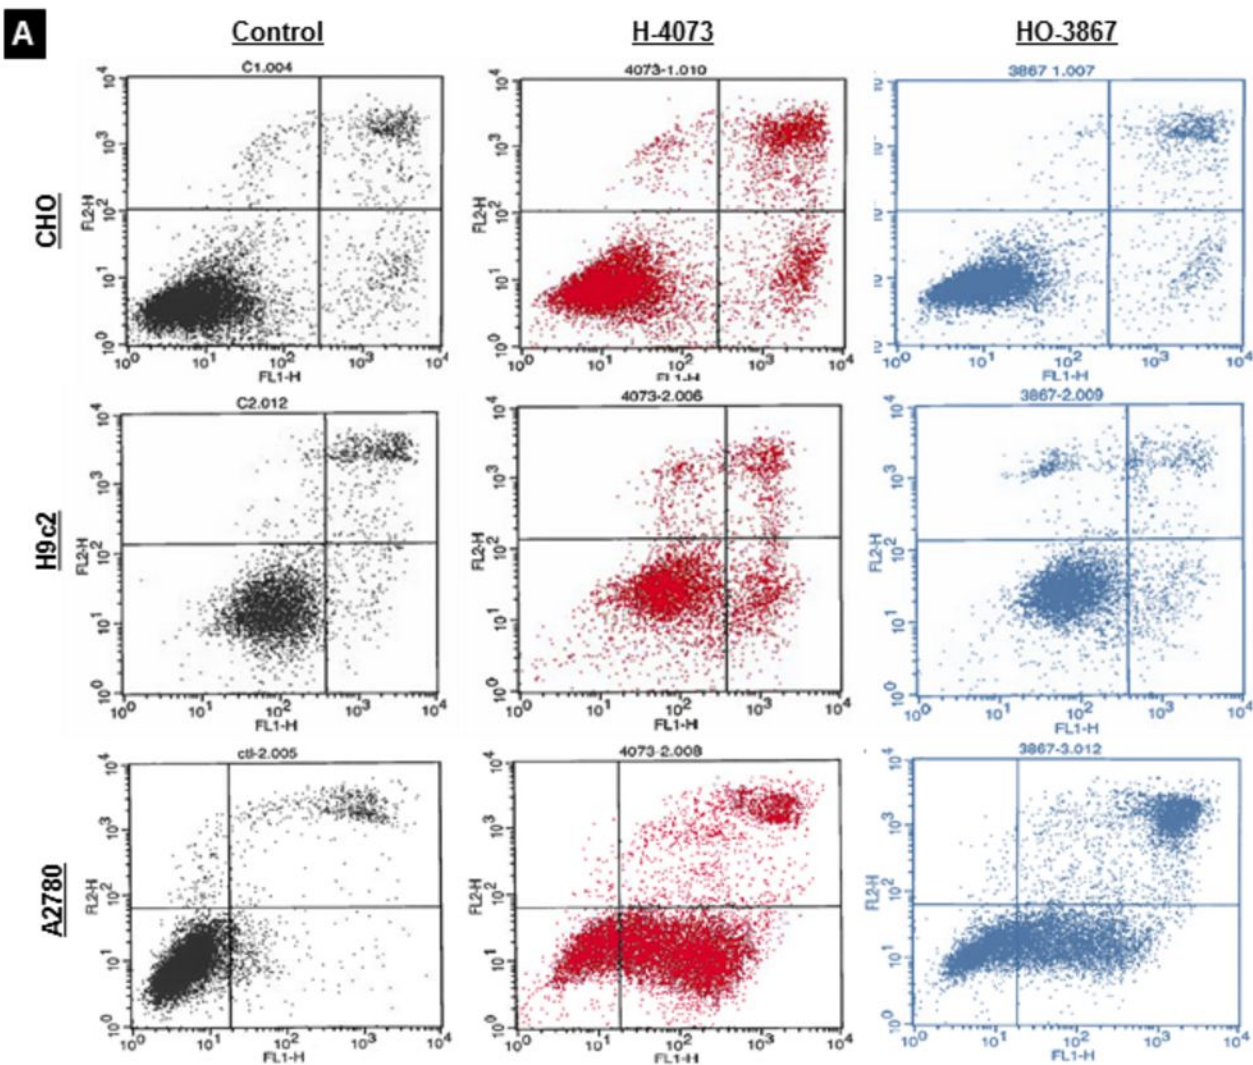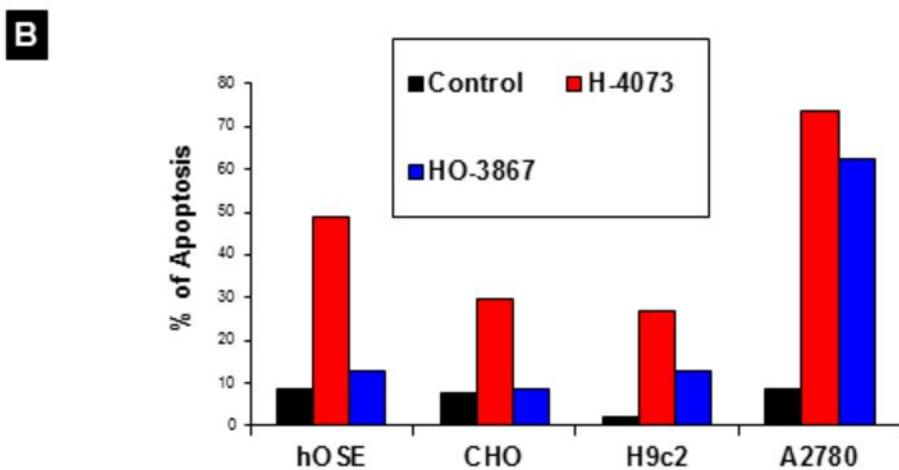

A. Representative Annexin V flow cytometry plots of CHO (Chinese hamster ovary), H9c2 (Cardiac), and A2780 (Ovarian cancer) cell lines treated using H-4073 and HO-3867 versus untreated control. B. Quantification of Annexin V-positive events from flow cytometric data. HO-3867 is selectively cytotoxic to cancer cells and less toxic to normal cells when compared with H-4073, which lacks the antioxidant-promoting -NOH moiety.
