# Supplementary material
Source: PubMed Central journal article supplement (PMC4286190)
Supplement: NIHMS650234-supplement-Supp_Data_-_Fig_5.pdf [file NIHMS650234-supplement-Supp_Data_-_Fig_5.pdf]

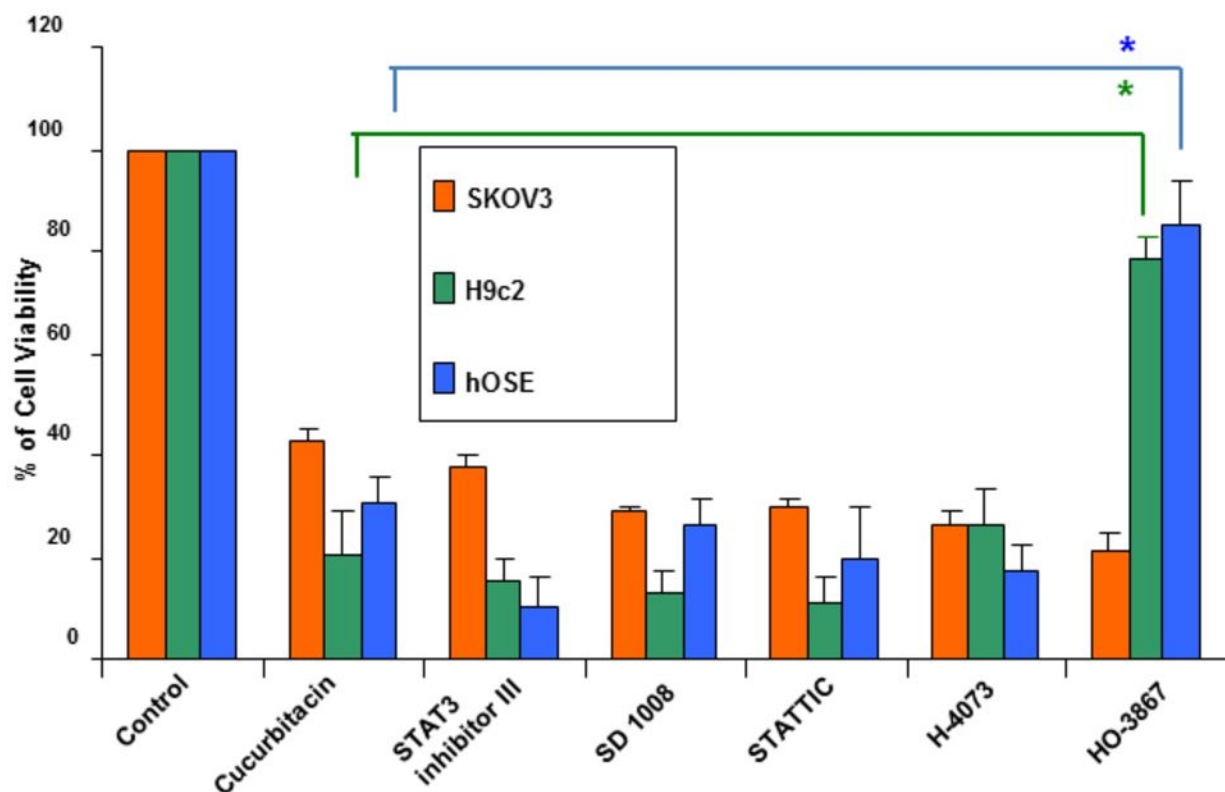

Viability of SKOV3, hOSE, and H9c2 cells treated with 10  $\mu$ M of H-4073 or HO-3867, compared to commercially-available STAT3 inhibitors as determined using a NucleoCounter. Untreated controls are also shown for comparison. Both H-4073 and HO-3867 significantly inhibit cancer cell (SKOV3) growth to the same degree as other available compounds, however, only HO-3867 exhibited selective cytotoxicity in sparing normal (H9c2 and hOSE) cells (\* $p$ <0.0001,  $n$ =6).
