# Supplementary material
Source: PubMed Central journal article supplement (PMC4286190)
Supplement: NIHMS650234-supplement-Supp_Data_-_Fig_6.pdf [file NIHMS650234-supplement-Supp_Data_-_Fig_6.pdf]

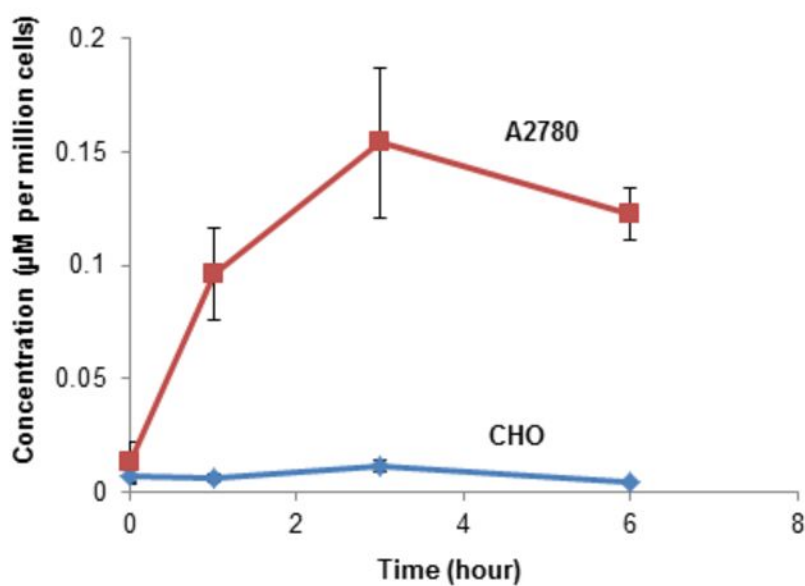

**H-4073 Cell uptake in A2780 and CHO cell lines.** The drug concentration in cell samples incubated over 0, 1, 3 and 6 hours was calculated against a calibration curve of H-4073 prepared in respective cell line and normalized to  $\mu\text{M}$  per million cells and reported as average  $\pm$ STD from triplicates as shown. As indicated by our data, H-4073 also has much stronger tendency to enter A2780 cells than CHO cells.

RT: 0.00- 41.99 SIM: 78

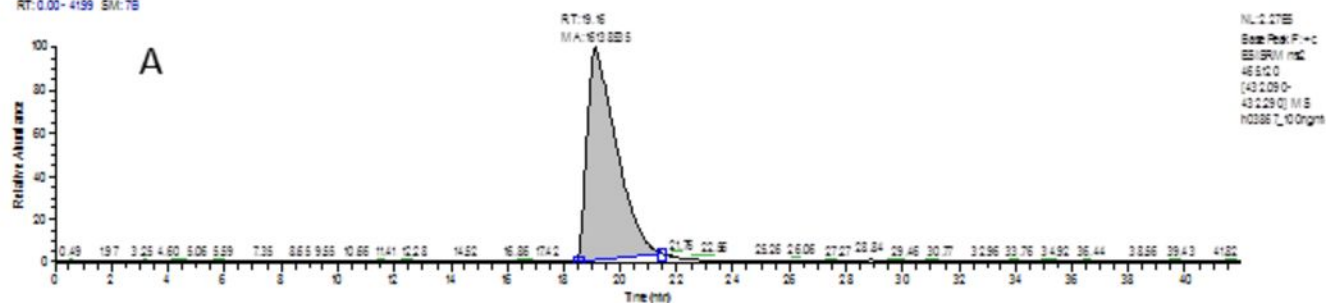

RT: 0.00- 42.00 SIM: 78

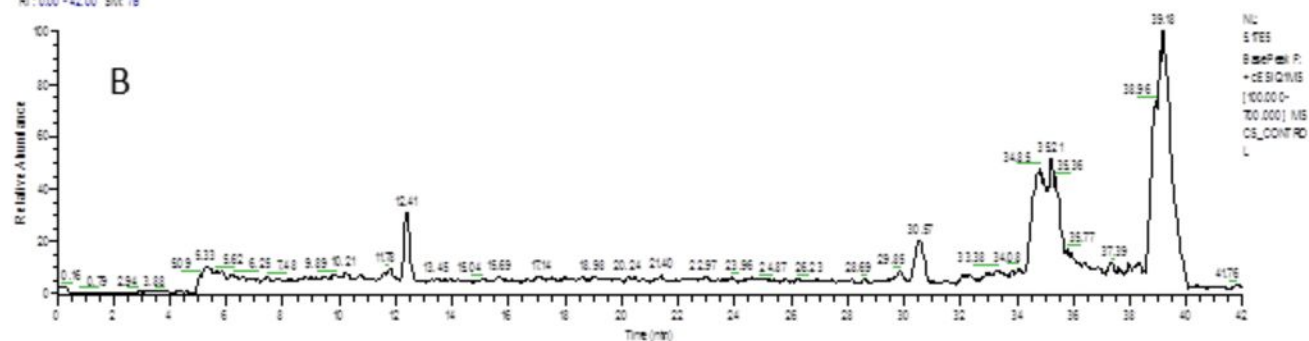

RT: 0.00- 42.01 SIM: 78

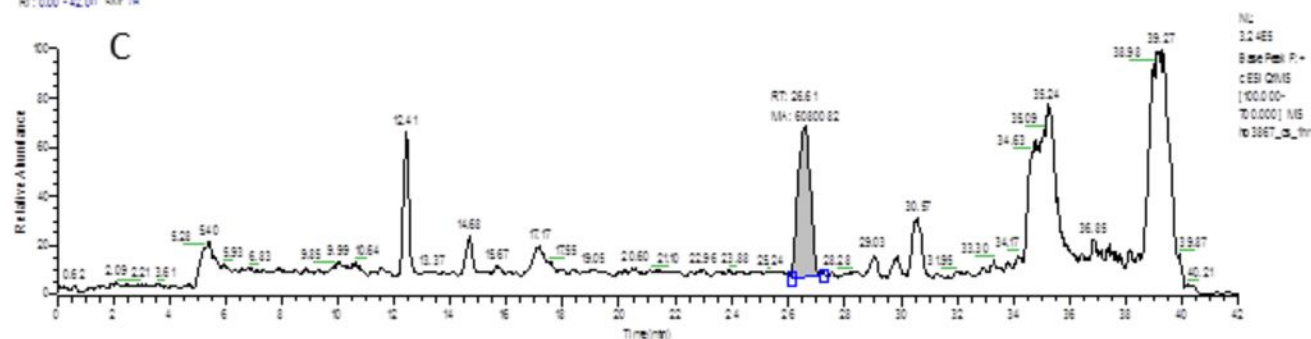

**A.** Ion chromatogram of pure HO-3867 (100 ng/ml) in neat solution used as positive control for analysis of treated samples.

**B.** Ion chromatogram of control (untreated) A2780 cell extract in neat solution used as negative control for analysis of treated samples.

**C.** Ion chromatogram of extract in neat solution obtained from A2780 cells treated with HO-3867 for 6 hours.

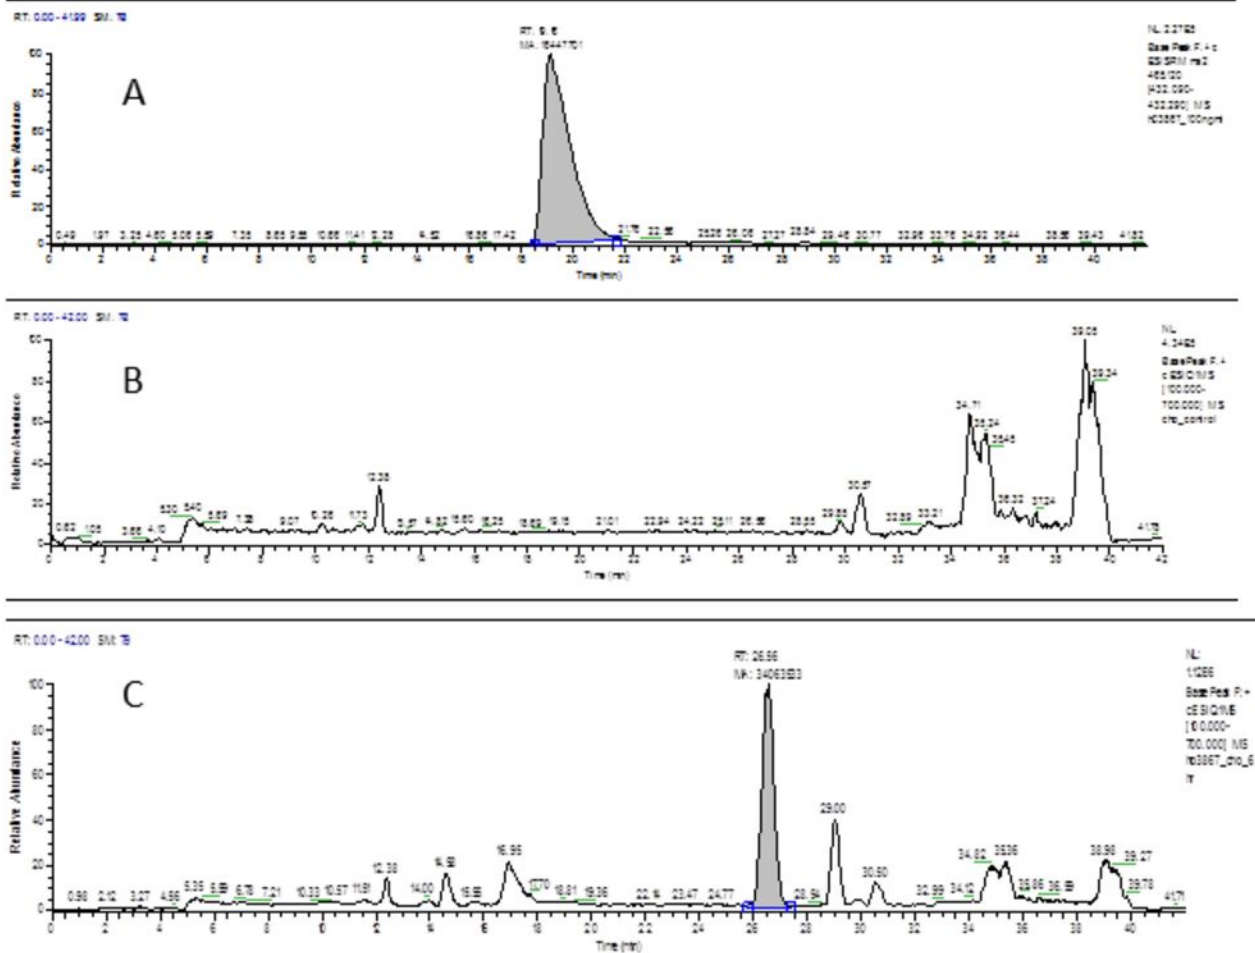

- A.** Ion chromatogram of pure HO-3867 (100 ng/ml) in neat solution used as positive control for analysis of treated samples.
- B.** Ion chromatogram of control (untreated) CHO cell extract in neat solution used as negative control for analysis of treated samples.
- C.** Ion chromatogram of extract in neat solution obtained from CHO cells treated with HO-3867 for 6 hours.

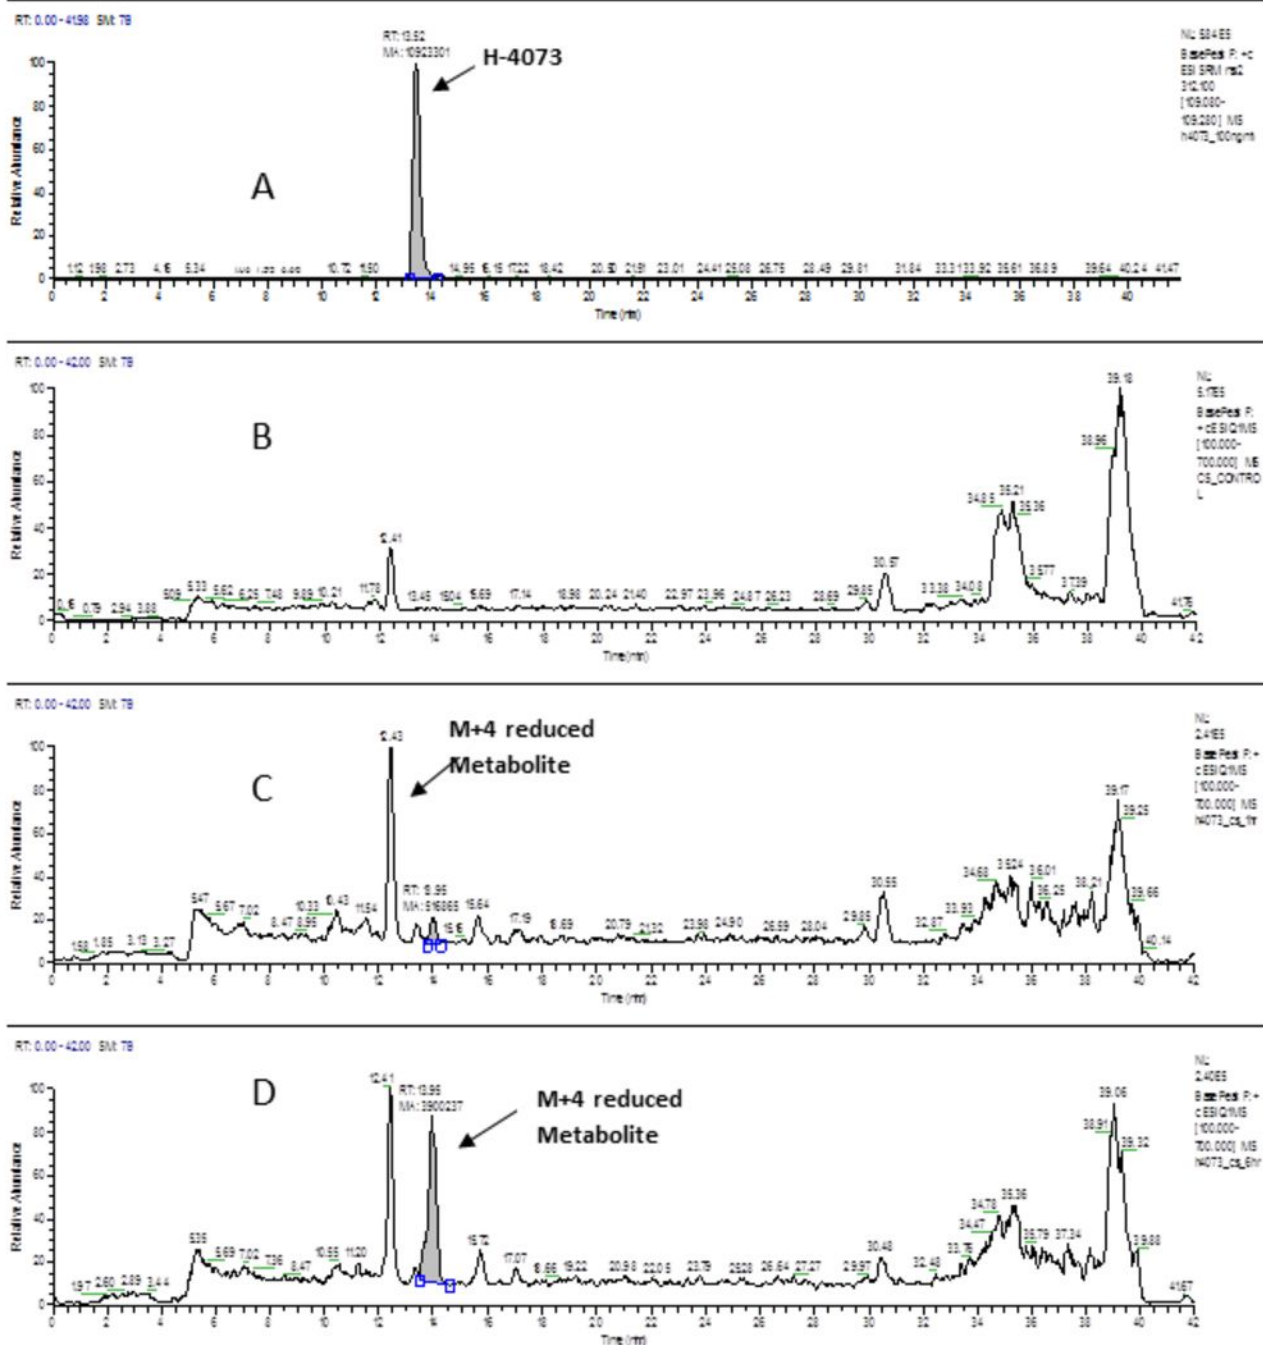

Extracted ion chromatograms of: **A.** H-4073 in neat solution as positive control, **B.** Untreated A2780 cell extract as negative control, **C.** A2780 cells treated for 1 hour with H-4073 and **D.** A2780 cells treated for 6 hours with H-4073. The latter two chromatograms show the intracellular metabolite produced from H-4073 uptake and processing by the cells.

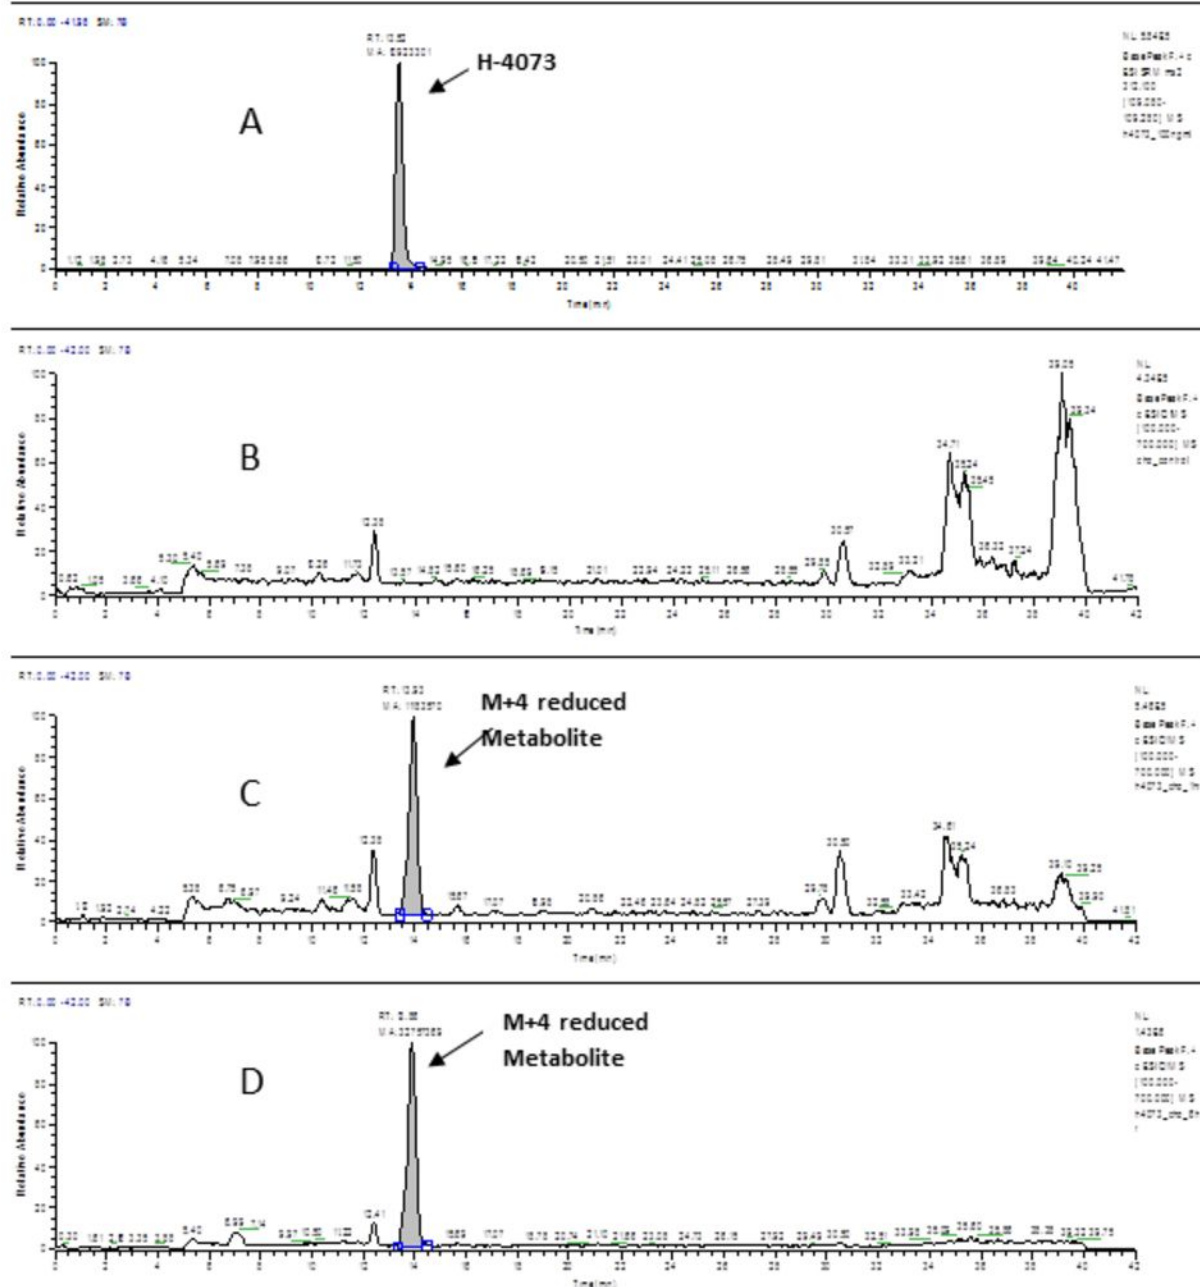

Extracted ion chromatograms of: **A.** H-4073 in neat solution as positive control, **B.** Untreated CHO cell extract as negative control, **C.** CHO cells treated for 1 hour with H-4073 and **D.** CHO cells treated for 6 hours with H-4073. The latter two chromatograms show the intracellular metabolite produced from H-4073 uptake and processing by the cells.
