# Supplementary material
Source: PubMed Central journal article supplement (PMC4286190)
Supplement: NIHMS650234-supplement-Supp_Data_-_Fig_7.pdf [file NIHMS650234-supplement-Supp_Data_-_Fig_7.pdf]

**A**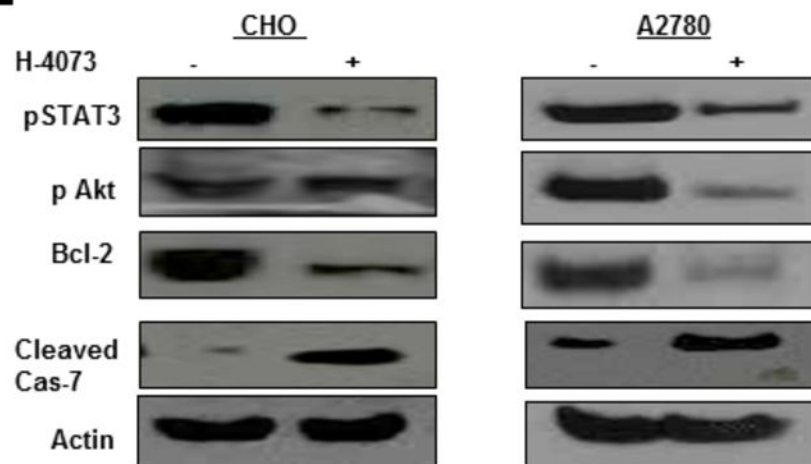**B**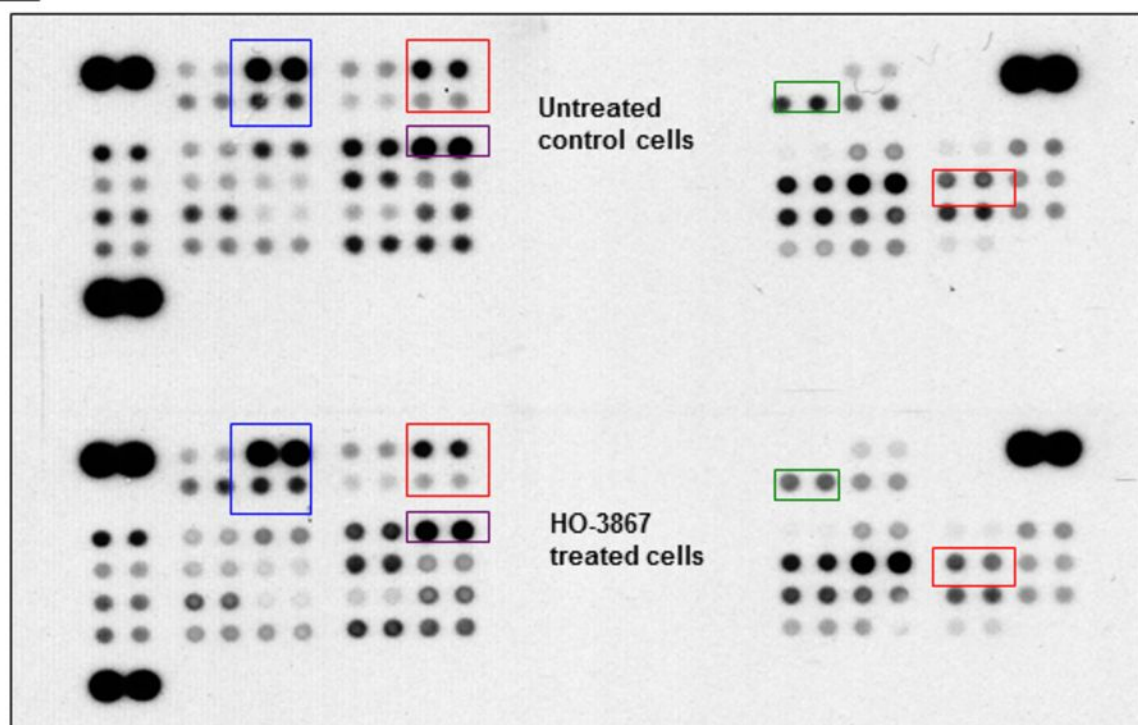

A. Immunoblot of CHO and A2780 cells treated with 10  $\mu$ M of H-4073 for 24 hours. H-4073 inhibits pSTAT3, Bcl-2 and induces cleaved cas-7 in both cancer and normal cells.  
 B. Phosphokinase assay array using CHO cells. There was no significant change in phosphokinase expression levels between untreated control cells (upper) and cells treated with 10  $\mu$ M of HO-3867 (lower).
