# Supplementary material
Source: PubMed Central journal article supplement (PMC4286190)
Supplement: NIHMS650234-supplement-Supp_Data_-_Fig_8.pdf [file NIHMS650234-supplement-Supp_Data_-_Fig_8.pdf]

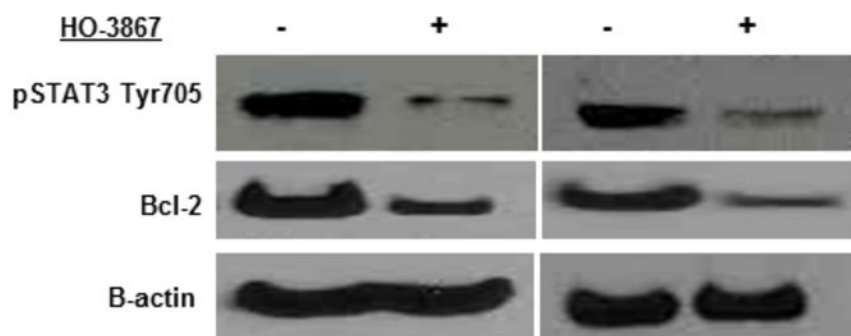

Immunoblot analysis for pSTAT3, and Bcl-2 using 2 different mice tissue lysates of xenograft ovarian tumors. Representative western blots showing decreased expression of pSTAT3 Tyr705 and Bcl-2 in HO-3867-treated tumor tissues versus un-treated controls.
