# Supplementary material
Source: PubMed Central journal article supplement (PMC4286190)
Supplement: NIHMS650234-supplement-Supp_Data_-_Fig_9.pdf [file NIHMS650234-supplement-Supp_Data_-_Fig_9.pdf]

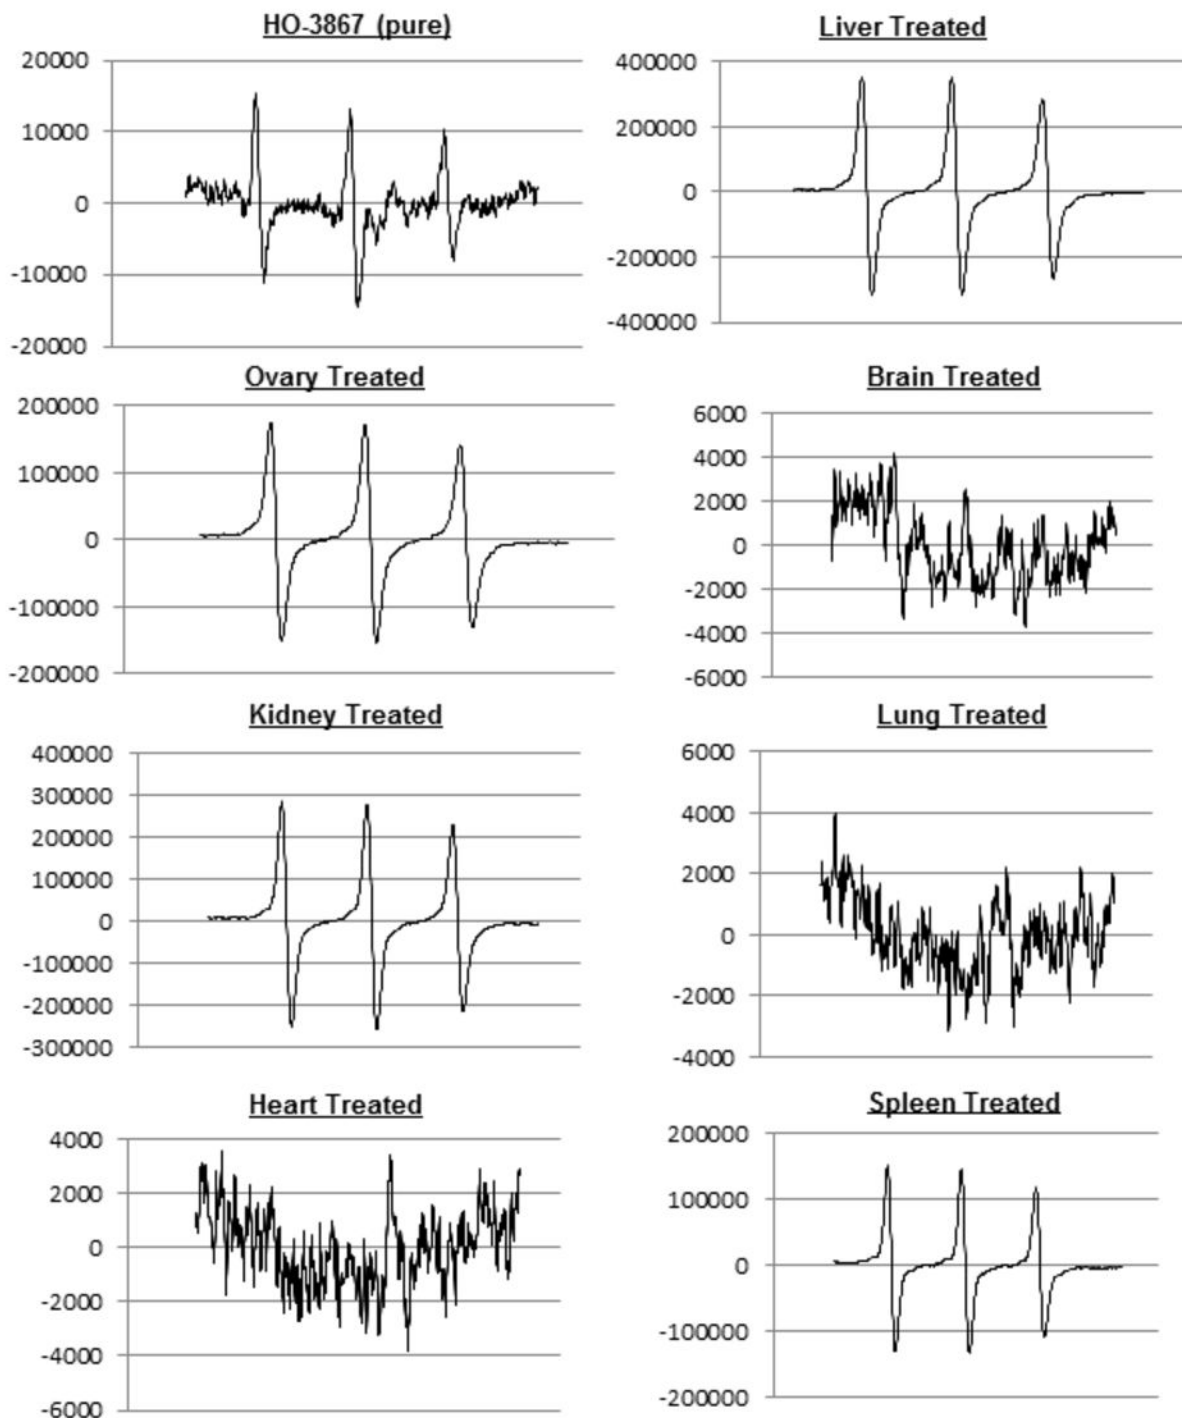

X-band (9.7 GHz) EPR spectra from organ tissue samples obtained from HO-3867-treated mice. A 1.0  $\mu\text{M}$  solution of HO-3867 in DMSO and distilled water was used as a positive control (top, left). Clear, triplet signals indicating the presence of the  $-\text{NO}^*$  radical (nitroxide) form of HO-3867 were obtained from liver, ovary, kidney, and spleen tissues. Brain, heart, and lung tissues appear to produce possible, but extremely weak signals. However, this is difficult to separate from inherent machine noise.
