# Supplementary material
Source: PubMed Central journal article supplement (PMC4286190)
Supplement: NIHMS650234-supplement-Supp_Data_-_Fig_10.pdf [file NIHMS650234-supplement-Supp_Data_-_Fig_10.pdf]

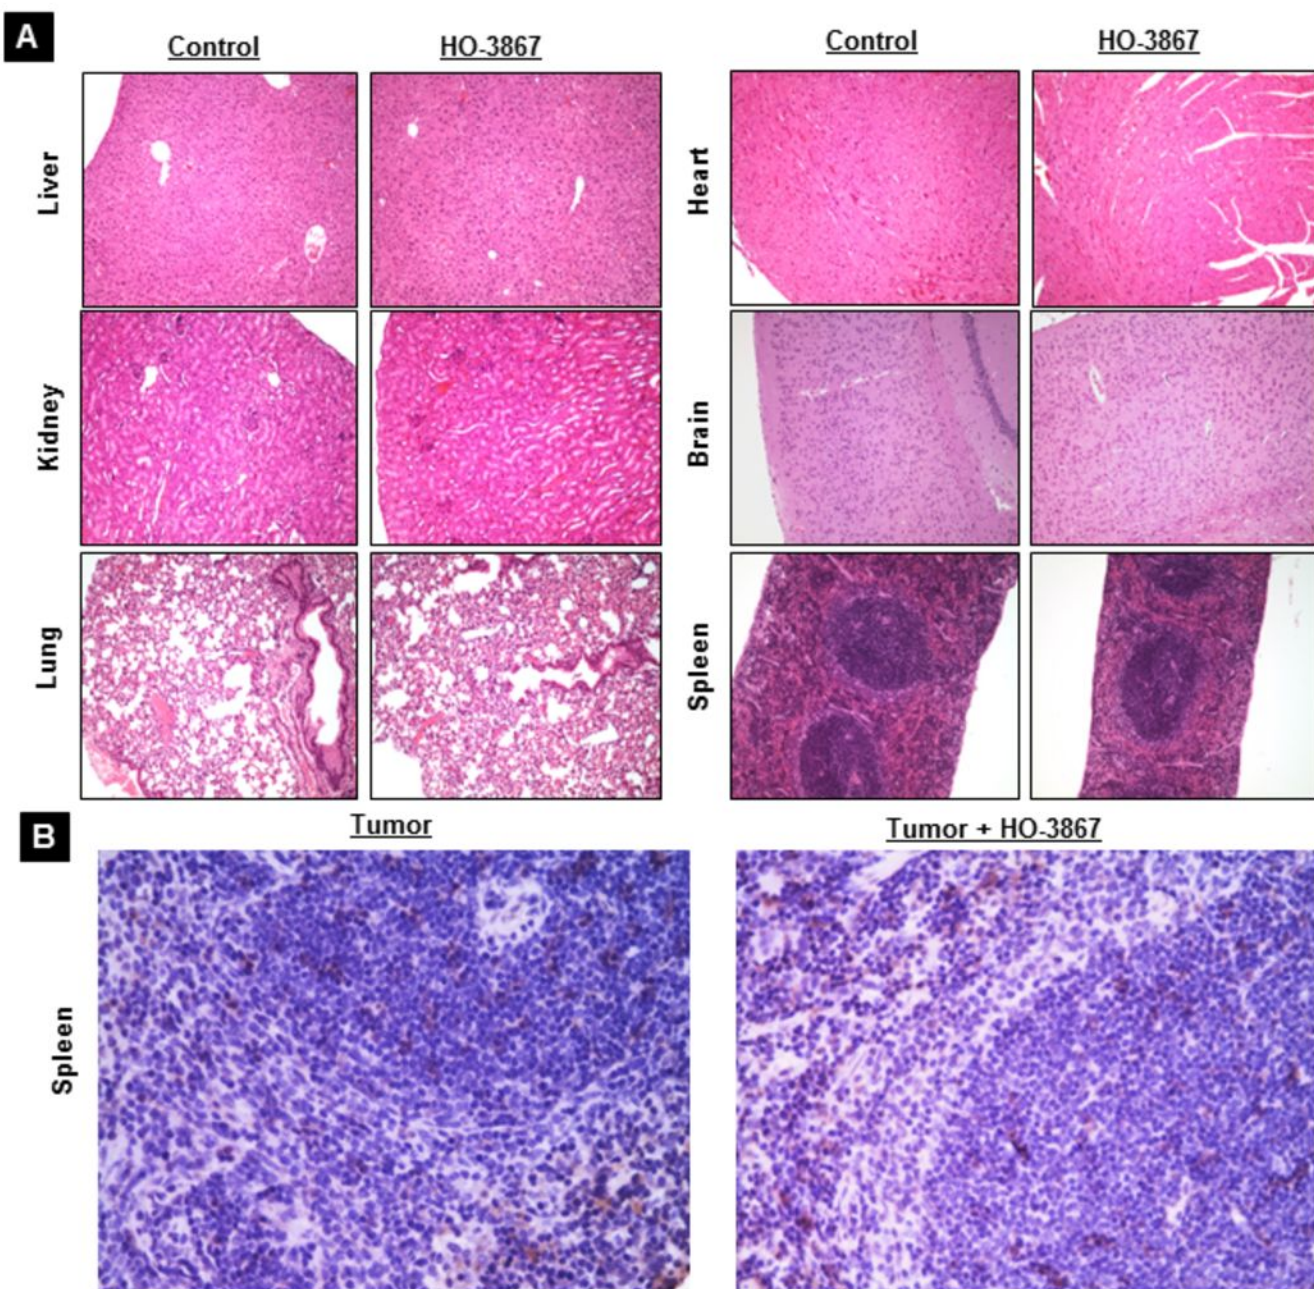

- A. H&E-stained organ tissue samples obtained from mice treated using HO-3867 delivered in the feed for 4 weeks compared to non-treated controls. Note the lack of lesions or necrotic tissue, indicating no apparent toxic side effects.
- B. TUNEL Stain. High levels of apoptosis in both untreated and HO-3867 treated tumor of spleen.
