# Supplementary material
Source: PubMed Central journal article supplement (PMC4286190)
Supplement: NIHMS650234-supplement-Supp_Data_-_Fig_11.pdf [file NIHMS650234-supplement-Supp_Data_-_Fig_11.pdf]

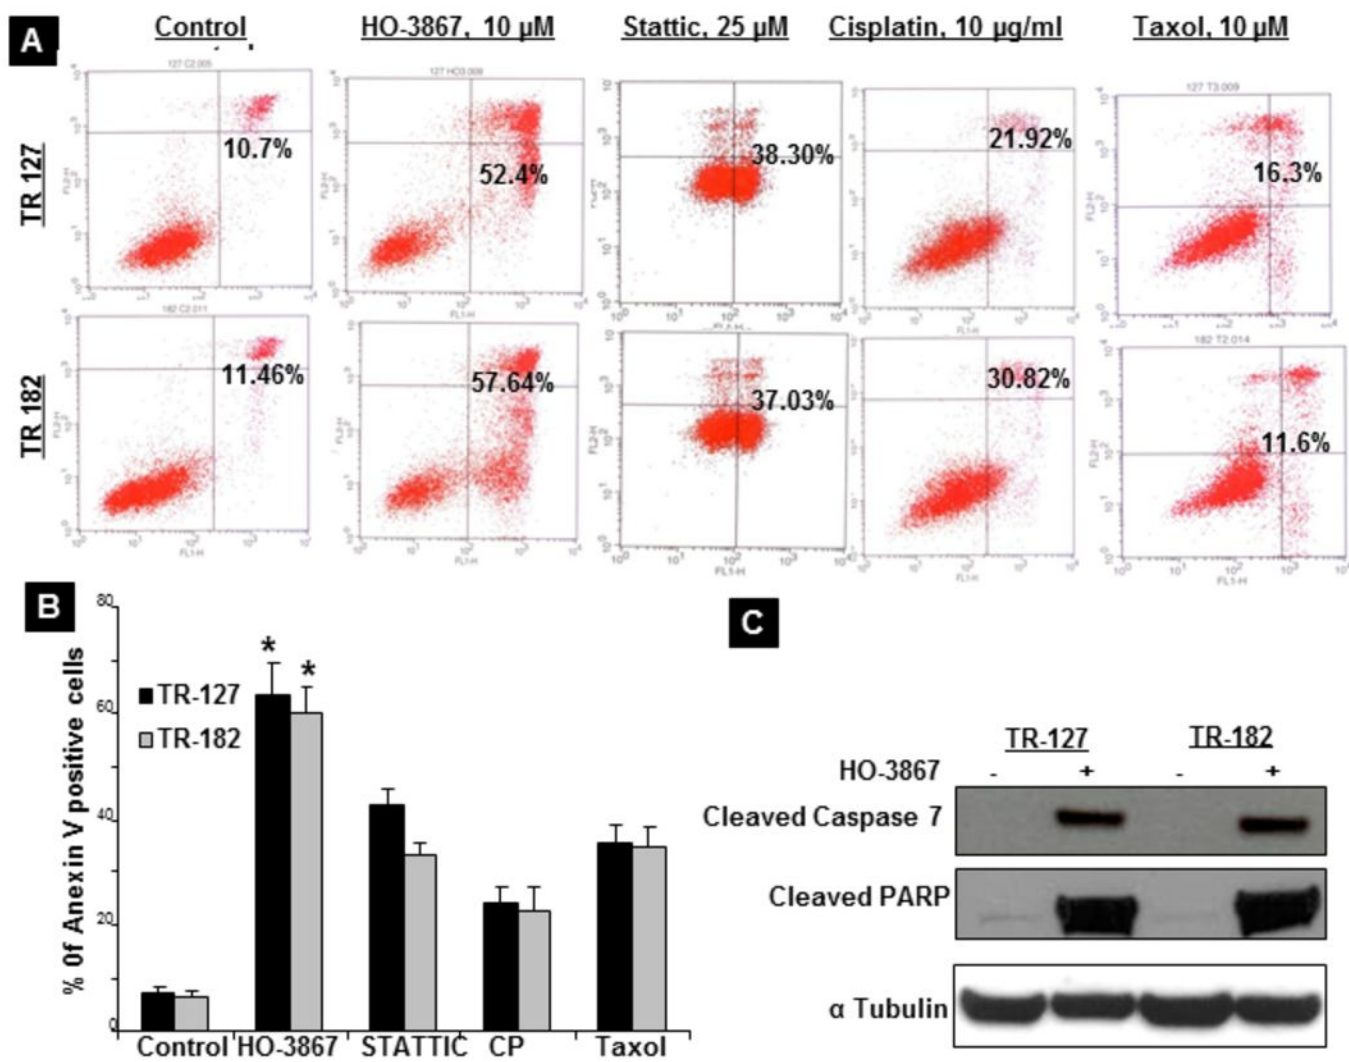

(A) Representative Annexin V flow cytometry plots of chemotherapy-resistant primary cell lines treated using HO-3867, STATTIC, Cisplatin (CP), and Taxol versus untreated controls. (B) Quantification of Annexin V-positive events from flow cytometric data. (C) Representative western blots showing increased cleaved caspase 7 and cleaved PARP expression in HO-3867-treated primary cell lines versus non-treated controls.
