# Supplementary material
Source: PubMed Central journal article supplement (PMC4286190)
Supplement: NIHMS650234-supplement-Supp_Data_-_Fig_12.pdf [file NIHMS650234-supplement-Supp_Data_-_Fig_12.pdf]

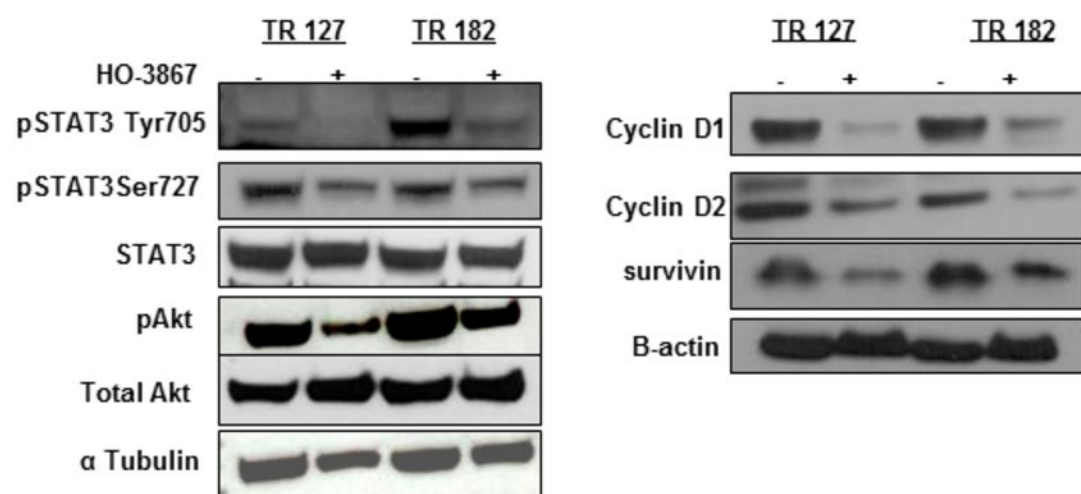

Western blots showing inhibition of pSTAT3 Y705 by HO-3867 treatment in primary cancer cell lines. Total STAT3 expression remains unchanged. Decreased expression is also noted in pAkt levels and the STAT3 target proteins Cyclin D1, Cyclin D2 and Survivin.
