# Supplementary material
Source: PubMed Central journal article supplement (PMC4286190)
Supplement: NIHMS650234-supplement-Supp_Data_-_Tables_1_-_2.pdf [file NIHMS650234-supplement-Supp_Data_-_Tables_1_-_2.pdf]

**Sup. Table S1**

| <b>Tukey's multiple comparisons test</b> | <b>Mean Diff.</b> | <b>95% CI of diff.</b> | <b>Significant</b> | <b>Summary</b> | <b>Adjusted P Value</b> |
|------------------------------------------|-------------------|------------------------|--------------------|----------------|-------------------------|
| <b>CHO</b>                               |                   |                        |                    |                |                         |
| Control vs. HO-3867                      | -0.1333           | -3.567 to 3.300        | No                 | ns             | 0.9948                  |
| Control vs. H-4073                       | -13.14            | -16.57 to -9.706       | Yes                | ****           | < 0.0001                |
| HO-3867 vs. H-4073                       | -13.01            | -16.44 to -9.573       | Yes                | ****           | < 0.0001                |
| <b>H9C2</b>                              |                   |                        |                    |                |                         |
| Control vs. HO-3867                      | 3.537             | 0.1029 to 6.970        | Yes                | *              | 0.0426                  |
| Control vs. H-4073                       | -10.35            | -13.79 to -6.920       | Yes                | ****           | < 0.0001                |
| HO-3867 vs. H-4073                       | -13.89            | -17.32 to -10.46       | Yes                | ****           | < 0.0001                |
| <b>A2780</b>                             |                   |                        |                    |                |                         |
| Control vs. HO-3867                      | -54.06            | -57.49 to -50.62       | Yes                | ****           | < 0.0001                |
| Control vs. H-4073                       | -67.82            | -71.25 to -64.38       | Yes                | ****           | < 0.0001                |
| HO-3867 vs. H-4073                       | -13.76            | -17.19 to -10.33       | Yes                | ****           | < 0.0001                |

Table 1: Results of Tukey's post-hoc test using a 95% confidence interval ( $\alpha = 0.05$ ) for analysis of apoptosis data. The data was grouped according to cell type, and comparisons between different cell types were not considered.

**Sup. Table S2**

| <b>DAP - compounds</b> | <b>Base Molecular Weight</b> | <b>Major Metabolic Product Weight</b> | <b>Metabolic Product Classification</b> |
|------------------------|------------------------------|---------------------------------------|-----------------------------------------|
| <b>HO-3867</b>         | 465.12                       | 469.87                                | <i>M+4</i>                              |
| <b>H-4073</b>          | 312.10                       | 316.57                                | <i>M+4</i>                              |

Table 2. Molecular weights of the pure DAP compounds and the primary metabolic product from *in vitro* studies as determined by LCMS analysis.
